# Supplementary material for: Salicylic Acid Is Required for Broad-Spectrum Disease Resistance in Rice
Source: Int J Mol Sci. 2022 Jan 25;23(3):1354. doi: 10.3390/ijms23031354 (PMC8836234; doi:10.3390/ijms23031354)
Supplement: Supplementary file 1 [file ijms-23-01354-s001.zip › Table S1.xlsx]

## Sheet: primers
Supplemental Table S1. Primers sequences used in this study
Primer	Gene ID	Forward sequence(5'-3')	Reverse sequence(5'-3')
For protein expression
OsSAH1	LOC_Os03g03034	TGGATCCGGCATGGCGGACCAGCTCATC	TCACGTGAGATGTGTCTGTAGGTGTTGTTCT
OsSAH2	LOC_Os04g49194	AGGATCCTCTCCCATGGCAACGACGCAGTTG	ACACGTGGCCTTTGAAGAGCTCTAGGCAG
OsSAH3	LOC_Os04g49210	AAGATCTAACATGGCTCCAGCCATTGCCAAG	ACACGTGGACGGCCTGATCGTTAGGCCGGAAC
OsSAH4	LOC_Os10g39140	AGGATCCGTGAACATGGCGGCGGAGG	TCACGTGAGTCCTGAACAGCTCGAGGCAGT
AtDMR6	At5g24530	TGGATCCCAAATGGCGGCAAAGCTGATA	ACACGTGGTTGTTTAGAAAATTCTCGAGGC
For site-directed mutagenesis
OsSAH2Y127F		CACAACTGGAGAGATTTCCTCCGCCTTCACTGC	GCAGTGAAGGCGGAGGAAATCTCTCCAGTTGTG
OsSAH2M282A		GCGGTGCAAGAGCGCGCGTCGGTGGCATCTTTC	GAAAGATGCCACCGACGCGCGCTCTTGCACCGC
OsSAH2M282I		CGGTGCAAGAGCGCATCTCGGTGGCATCTTTCA	TGAAAGATGCCACCGAGATGCGCTCTTGCACCG
OsSAH2A285P		GAGCGCATGTCGGTGCCGTCTTTCATGTGTCCG	CGGACACATGAAAGACGGCACCGACATGCGCTC
OsSAH2M282I-A285P		CGGTGCAAGAGCGCATCTCGGTGCCGTCTTTCA	TGAAAGACGGCACCGAGATGCGCTCTTGCACCG
OsSAH3F136Y		AGCAACTGGCGCGACTATCTGCGCTTGCATTGC	GCAATGCAAGCGCAGATAGTCGCGCCAGTTGCT
OsSAH3I289M		AGCGAGAGCGAGAGGATGTCCGTGCCGACGTTC	GAACGTCGGCACGGACATCCTCTCGCTCTCGCT
OsSAH3I289W		AGCGAGAGCGAGAGGTGGTCCGTGCCGACGTTC	GAACGTCGGCACGGACCACCTCTCGCTCTCGCT
OsSAH3P292A		GAGAGGATCTCCGTGGCAACGTTCTACTGCCCG	CGGGCAGTAGAACGTTGCCACGGAGATCCTCTC
OsSAH3I289M-P292A		GAGCGAGAGGATGTCCGTGGCAACGTTCTACT	AGTAGAACGTTGCCACGGACATCCTCTCGCTC
AtDMR6Y126F		ACAATTGGAGAGACTTCCTAAGACTCCATTGT	ACAATGGAGTCTTAGGAAGTCTCTCCAATTGT
AtDMR6A283P		CCGAGACTATCGGTCCCGTCGTTTCTGTGCCCA	TGGGCACAGAAACGACGGGACCGATAGTCTCGG
For qRT-PCR
OsSAH1	LOC_Os03g03034	TTCTCAAGGAAGGCAGGTGGATCG	TTCCGTTGCTTAGCGCCTGTAG
OsSAH2	LOC_Os04g49194	GCATGTCGGTGGCATCTTTCAT	CGTAGGTGAAGCTCCGGTA
OsSAH3	LOC_Os04g49210	AAGTGCTATTCCGACGACC	ATGCAAGCGCAGGAAGTCGC
OsSAH4	LOC_Os10g39140	GGCGGTGAACTACTACCCAC	TGGTCGTCCATGAGGAGGAT
OsWRKY45	LOC_Os05g25770	CGGGTAAAACGATCGAAAGA	TTTCGAAAGCGGAAGAACAG
OsWRKY76	LOC_Os09g25060	AGGTCGCGTCGCCGGAGTTC	TCGGGCAGCTTCTGGAGGATCG
OsMYC2	LOC_Os10g42430	CTAGCGAGGAAACCCAATCG	TCGTCTCGTCGTCTTCTTGG
OsTPS19	LOC_Os04g27190	GAGTGCTATATCAATGAGCAC	ACAGATTCCCAACATTTCCC
OsAOS2	LOC_Os03g12500	TGCTTAAGCCGGCCATCACTTC	ATATGCGTAGGACGGAGCTGGTTG
OsPR1b	LOC_Os07g03600	CGATCAGCGCCCTTACTAGC	ACACACAATCCGGCTACATAGAT
OsPAL1	LOC_Os02g41630	TTCTTCGTTCGTTGCCGTTTGG	AGCTGAGCAGAGCAGCTAACAC
OsPAL4	LOC_Os02g41680	ATCACCGAGTGCAGGTCGTATC	TCGCCGGTCAGGTACTTTGTTC
OsUBQ	LOC_Os06g46770	GTGGTGGCCAGTAAGTCCTC	GGACACAATGATTAGGGATCA
B. oryzae 26S rDNA	KP211440.1	GTCTCCCTCTTTCTGGGAGAC	GGACGGTAATCCATCAAGACTC
